# Supplementary material for: The hatching time of broiler chickens modifies not only the production traits, but also the early bacteriota development of the ceca
Source: Preprints.org preprint supplement (doi:10.20944/preprints202308.0198.v1), 2023-08-03
Supplement: Supplementary file 3 [file supplementary]

**Supplementary Material**

The hatching time of broiler chickens modifies not only the production traits, but also the bacteriota development in the ceca

Nikoletta Such 1, Kornél Schermann 1, László Pál 1, László Menyhárt 2, Valéria Farkas 1, Gábor Csitári 1,Brigitta Kiss 1, Kesete Goitom Tewelde 1 and Károly Dublecz 1

1 Institute of Physiology and Nutrition, Hungarian University of Agriculture and Life Sciences, Georgikon Campus, 8360 Keszthely, Hungary; Deák Ferenc Street 16.; [such.nikoletta.amanda@uni-mate.hu](mailto:such.nikoletta.amanda@uni-mate.hu); [schermannkornel2000@gmail.com](mailto:schermannkornel2000@gmail.com); [pal.laszlo@uni-mate.hu](mailto:pal.laszlo@uni-mate.hu); [farkas.valeria@uni-mate.hu](mailto:farkas.valeria@uni-mate.hu); [csitari.gabor@uni-mate.hu](mailto:csitari.gabor@uni-mate.hu); [kiss.brigitta.gyongyi@phd.uni-mate.hu](mailto:kiss.brigitta.gyongyi@phd.uni-mate.hu); [kesete.goitom.tewelde@phd.uni-mate.hu](mailto:kesete.goitom.tewelde@phd.uni-mate.hu); [dublecz.karoly@uni-mate.hu](mailto:dublecz.karoly@uni-mate.hu)

2 Institute of Technology, Hungarian University of Agriculture and Life Sciences, Georgikon Campus, Deák Ferenc Street 16, 8360 Keszthely, Hungary; [menyhart.laszlo@uni-mate.hu](mailto:menyhart.laszlo@uni-mate.hu)

* Correspondence: [dublecz.karoly@uni-mate.hu](mailto:dublecz.karoly@uni-mate.hu)

† These authors contributed equally to this work.

**Table S1.** The effect of hatching time and parent age on the caecal microbiota composition at the family level at 11 day of age.

| **Family (%)** |  | **Parent flock age** | |  | **FDR p-values** | | |
| --- | --- | --- | --- | --- | --- | --- | --- |
| **Hatching time** | **Young parent** | **Old parent** | **Average (Hatching time)** | **Hatching time** | **Parent flock age** | **Interaction** |
| *Ruminococcaceae* | Early | 35.051 | 33.467 | 34.259 | 0.443 |  | 0.635 |
| Late | 29.792 | 24.768 | 27.280 |
| Average (Age) | 32.422 | 29.118 |  | 0.750 | | |
| *Lachnospiraceae* | Early | 22.571 | 30.636 | 26.604 | 0.886 |  | 0.846 |
| Late | 27.650 | 23.050 | 25.350 |
| Average (Age) | 25.111 | 26.843 |  | 0.683 | | |
| *Lactobacillaceae* | Early | 14.110 | 12.439 | 13.275 | 0.504 |  | 0.729 |
| Late | 10.458 | 7.046 | 8.752 |
| Average (Age) | 12.284 | 9.743 |  | 0.717 | | |
| *Bacteroidaceae* | Early | 9.662 | 5.952 | 7.807 | 0.517 |  | 0.933 |
| Late | 12.424 | 27.494 | 19.959 |
| Average (Age) | 11.043 | 16.723 |  | 0.742 | | |
| *Erysipelotrichaceae* | Early | 4.533 | 5.118 | 4.826 | 0.542 |  | 0.425 |
| Late | 2.845 | 3.680 | 3.262 |
| Average (Age) | 3.689 | 4.399 |  | 0.702 | | |
| *Peptostreptococcaceae* | Early | 0.318 | 1.073 | 0.695 | 0.533 |  | 0.921 |
| Late | 0.232 | 0.372 | 0.302 |
| Average (Age) | 0.275 | 0.722 |  | 0.816 | | |
| *Clostridiales_vadinBB60_group* | Early | 3.098 | 5.917 | 4.508 | 0.294 |  | 0.634 |
| Late | 7.171 | 7.921 | 7.546 |
| Average (Age) | 5.135 | 6.919 |  | 0.849 | | |
| *Enterococcaceae* | Early | 0.435 | 1.172 | 0.804 | 0.849 |  | 0.707 |
| Late | 0.895 | 0.518 | 0.706 |
| Average (Age) | 0.665 | 0.845 |  | 0.695 | | |
| *Enterobacteriaceae* | Early | 0.153 | 0.420 | 0.287 | 0.365 |  | 1.447 |
| Late | 1.929 | 0.398 | 1.163 |
| Average (Age) | 1.041 | 0.409 |  | 0.965 | | |
| *Christensenellaceae* | Early | 0.192 | 0.124 | 0.158 | 0.589 |  | 0.553 |
| Late | 0.103 | 0.052 | 0.077 |
| Average (Age) | 0.148 | 0.088 |  | 0.700 | | |
| *Defluviitaleaceae* | Early | 0.108 | 0.124 | 0.116 | 0.959 |  | 0.914 |
| Late | 0.099 | 0.129 | 0.114 |
| Average (Age) | 0.103 | 0.127 |  | 0.699 | | |
| *Eggerthellaceae* | Early | 0.071 | 0.088 | 0.079 | 0.374 |  | 0.950 |
| Late | 0.040 | 0.063 | 0.051 |
| Average (Age) | 0.055 | 0.075 |  | 0.910 | | |
| *Family_XIII* | Early | 0.075 | 0.064 | 0.070 | 0.708 |  | 0.912 |
| Late | 0.076 | 0.030 | 0.053 |
| Average (Age) | 0.076 | 0.047 |  | 0.832 | | |
| *Pseudomonadaceae* | Early | 0.006 | 0.008 | 0.007 | 0.502 |  | 0.736 |
| Late | 0.002 | 0.001 | 0.002 |
| Average (Age) | 0.004 | 0.005 |  | 0.916 | | |
| *Staphylococcaceae* | Early | 0.003 | 0.000 | 0.002 | 0.990 |  | 0.818 |
| Late | 0.004 | 0.000 | 0.002 |
| Average (Age) | 0.004 | 0.000 |  | 1.131 | | |
| *Anaeroplasmataceae* | Early | 3.444 | 1.118 | 2.281 | 0.513 |  | 0.850 |
| Late | 1.788 | 0.275 | 1.032 |
| Average (Age) | 2.616 | 0.697 |  | 0.526 | | |
| *Bacillaceae* | Early | 4.044 | 1.726 | 2.885 | 0.837 |  | 0.805 |
| Late | 3.246 | 3.838 | 3.542 |
| Average (Age) | 3.645 | 2.782 |  | 0.664 | | |
| *Clostridiaceae_1* | Early | 0.257 | 0.222 | 0.239 | 0.888 |  | 0.411 |
| Late | 0.659 | 0.022 | 0.340 |
| Average (Age) | 0.458 | 0.122 |  | 0.669 | | |
| *Not_Assigned* | Early | 1.560 | 0.149 | 0.854 | 0.535 |  | 0.895 |
| Late | 0.339 | 0.007 | 0.173 |
| Average (Age) | 0.950 | 0.078 |  | 0.805 | | |
| *Peptococcaceae* | Early | 0.027 | 0.012 | 0.019 | 0.835 |  | 0.692 |
| Late | 0.014 | 0.035 | 0.024 |
| Average (Age) | 0.020 | 0.023 |  | 0.913 | | |
| *Rikenellaceae* | Early | 0.001 | 0.000 | 0.001 | 0.720 |  | 0.970 |
| Late | 0.000 | 0.008 | 0.004 |
| Average (Age) | 0.001 | 0.004 |  | 0.680 | | |
| *Streptococcaceae* | Early | 0.000 | 0.043 | 0.021 | 0.595 |  | 1.116 |
| Late | 0.002 | 0.000 | 0.001 |
| Average (Age) | 0.001 | 0.021 |  | 0.680 | | |

**Table S2.** The effect of hatching time and parent age on the caecal microbiota composition at the family level at 39 day of age.

| **Family (%)** |  | **Parent flock age** | |  | **FDR p-values** | | |
| --- | --- | --- | --- | --- | --- | --- | --- |
| **Hatching time** | **Young parent** | **Old parent** | **Average (Hatching time)** | **Hatching time** | **Parent flock Age** | **Interaction** |
| *Ruminococcaceae* | Early | 29.016 | 28.005 | 28.510 | 0.911 |  | 0.762 |
| Late | 30.406 | 27.834 | 29.120 |
| Average (Age) | 29.711 | 27.919 |  | 0.639 | | |
| *Lachnospiraceae* | Early | 25.967 | 20.575 | 23.271 | 0.892 |  | 0.680 |
| Late | 23.783 | 26.714 | 25.249 |
| Average (Age) | 24.875 | 23.645 |  | 0.863 | | |
| *Lactobacillaceae* | Early | 25.336 | 32.926 | 29.131 | 0.735 |  | 0.657 |
| Late | 24.549 | 20.733 | 22.641 |
| Average (Age) | 24.943 | 26.830 |  | 0.861 | | |
| *Bacteroidaceae* | Early | 2.984 | 1.325 | 2.155 | 1.012 |  | 0.896 |
| Late | 2.628 | 1.709 | 2.169 |
| Average (Age) | 2.806 | 1.517 |  | 1.016 | | |
| *Erysipelotrichaceae* | Early | 2.016 | 1.862 | 1.939 | 0.613 |  | 0.785 |
| Late | 1.822 | 3.414 | 2.618 |
| Average (Age) | 1.919 | 2.638 |  | 0.979 | | |
| *Peptostreptococcaceae* | Early | 0.822 | 0.857 | 0.839 | 1.015 |  | 0.810 |
| Late | 1.401 | 2.214 | 1.807 |
| Average (Age) | 1.112 | 1.535 |  | 0.604 | | |
| *Clostridiales_vadinBB60_group* | Early | 3.259 | 2.806 | 3.032 | 0.963 |  | 0.853 |
| Late | 3.651 | 2.622 | 3.136 |
| Average (Age) | 3.455 | 2.714 |  | 0.720 | | |
| *Enterococcaceae* | Early | 0.081 | 0.482 | 0.282 | 0.862 |  | 0.789 |
| Late | 0.078 | 0.257 | 0.167 |
| Average (Age) | 0.080 | 0.370 |  | 0.647 | | |
| *Enterobacteriaceae* | Early | 0.142 | 0.113 | 0.128 | 0.689 |  | 0.824 |
| Late | 0.449 | 0.335 | 0.392 |
| Average (Age) | 0.296 | 0.224 |  | 0.844 | | |
| *Christensenellaceae* | Early | 1.529 | 0.976 | 1.252 | 0.847 |  | 0.739 |
| Late | 1.256 | 1.703 | 1.479 |
| Average (Age) | 1.392 | 1.340 |  | 0.951 | | |
| *Defluviitaleaceae* | Early | 0.185 | 0.100 | 0.142 | 0.938 |  | 0.488 |
| Late | 0.117 | 0.152 | 0.135 |
| Average (Age) | 0.151 | 0.126 |  | 0.628 | | |
| *Eggerthellaceae* | Early | 0.021 | 0.029 | 0.025 | 0.858 |  | 0.814 |
| Late | 0.017 | 0.042 | 0.030 |
| Average (Age) | 0.019 | 0.035 |  | 1.921 | | |
| *Family_XIII* | Early | 0.220 | 0.234 | 0.227 | 0.575 |  | 0.675 |
| Late | 0.131 | 0.218 | 0.174 |
| Average (Age) | 0.175 | 0.226 |  | 0.639 | | |
| *Pseudomonadaceae* | Early | 0.000 | 0.005 | 0.002 | 0.957 |  | 0.803 |
| Late | 0.002 | 0.003 | 0.003 |
| Average (Age) | 0.001 | 0.004 |  | 0.588 | | |
| *Staphylococcaceae* | Early | 0.004 | 0.000 | 0.002 | 0.860 |  | 0.925 |
| Late | 0.012 | 0.003 | 0.007 |
| Average (Age) | 0.008 | 0.001 |  | 0.755 | | |
| *Anaeroplasmataceae* | Early | 0.008 | 0.063 | 0.036 | 0.812 |  | 0.828 |
| Late | 0.002 | 0.034 | 0.018 |
| Average (Age) | 0.005 | 0.049 |  | 0.844 | | |
| *Bacillaceae* | Early | 1.465 | 2.362 | 1.914 | 0.884 |  | 0.647 |
| Late | 1.671 | 0.717 | 1.194 |
| Average (Age) | 1.568 | 1.540 |  | 0.966 | | |
| *Clostridiaceae_1* | Early | 0.000 | 0.007 | 0.003 | 0.953 |  | 0.842 |
| Late | 0.033 | 0.216 | 0.124 |
| Average (Age) | 0.016 | 0.112 |  | 0.605 | | |
| *Not_Assigned* | Early | 0.849 | 0.962 | 0.906 | 0.878 |  | 0.762 |
| Late | 1.136 | 0.949 | 1.042 |
| Average (Age) | 0.992 | 0.955 |  | 0.965 | | |
| *Peptococcaceae* | Early | 0.514 | 0.423 | 0.469 | 0.880 |  | 0.767 |
| Late | 0.594 | 0.425 | 0.510 |
| Average (Age) | 0.554 | 0.424 |  | 0.742 | | |
| *Rikenellaceae* | Early | 0.018 | 0.003 | 0.010 | 0.814 |  | 0.650 |
| Late | 0.003 | 0.007 | 0.005 |
| Average (Age) | 0.011 | 0.005 |  | 0.576 | | |
| *Streptococcaceae* | Early | 0.426 | 0.044 | 0.235 | 0.747 |  | 0.695 |
| Late | 0.589 | 1.844 | 1.217 |
| Average (Age) | 0.508 | 0.944 |  | 0.622 | | |
